# Supplementary material
Source: PubMed Central journal article supplement (PMC9487175)
Supplement: mmc1.pdf [file mmc1.pdf]

Supplementary Figure S1. Flow chart diagram.

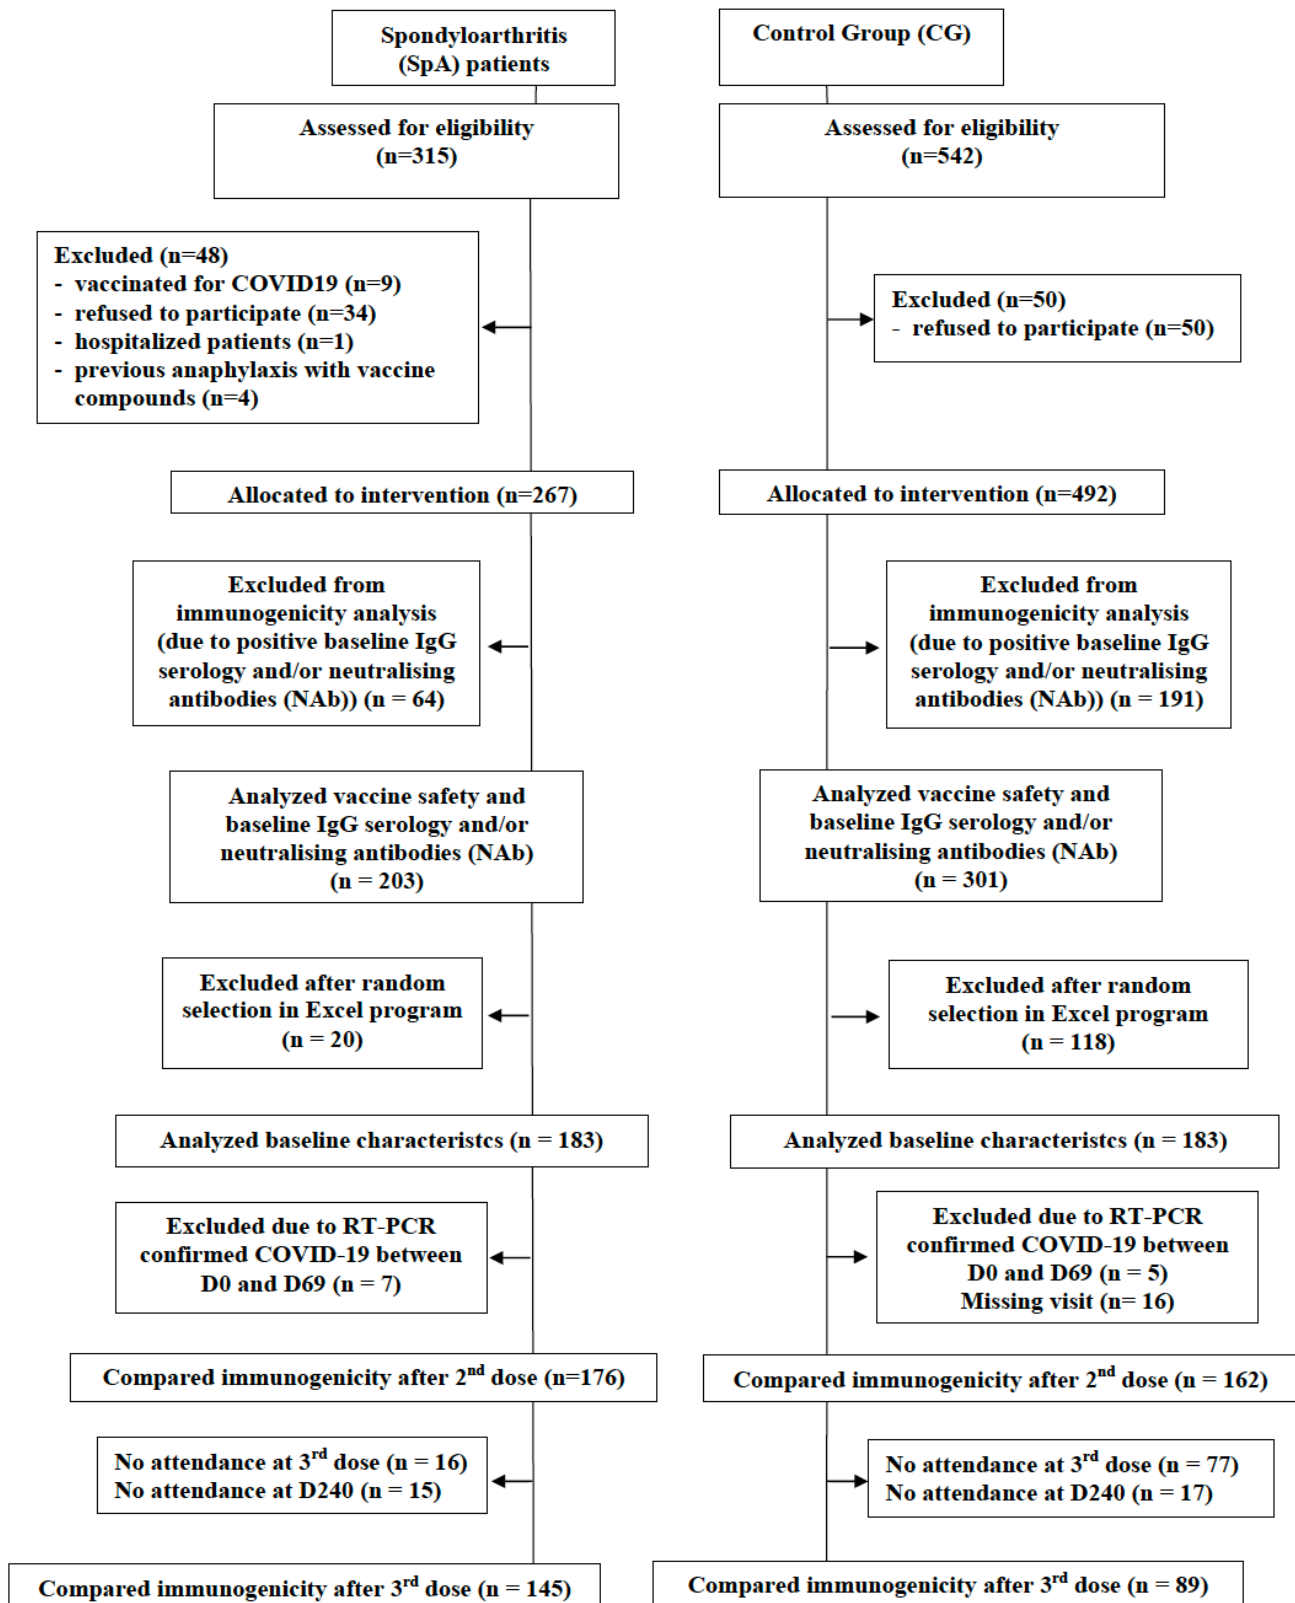

**Supplementary Figure S2.** Napierian logarithmic(ln)-transformed anti-SARS-CoV-2 S1/S2 IgG titers at D69 according to SpA treatments in comparison CG

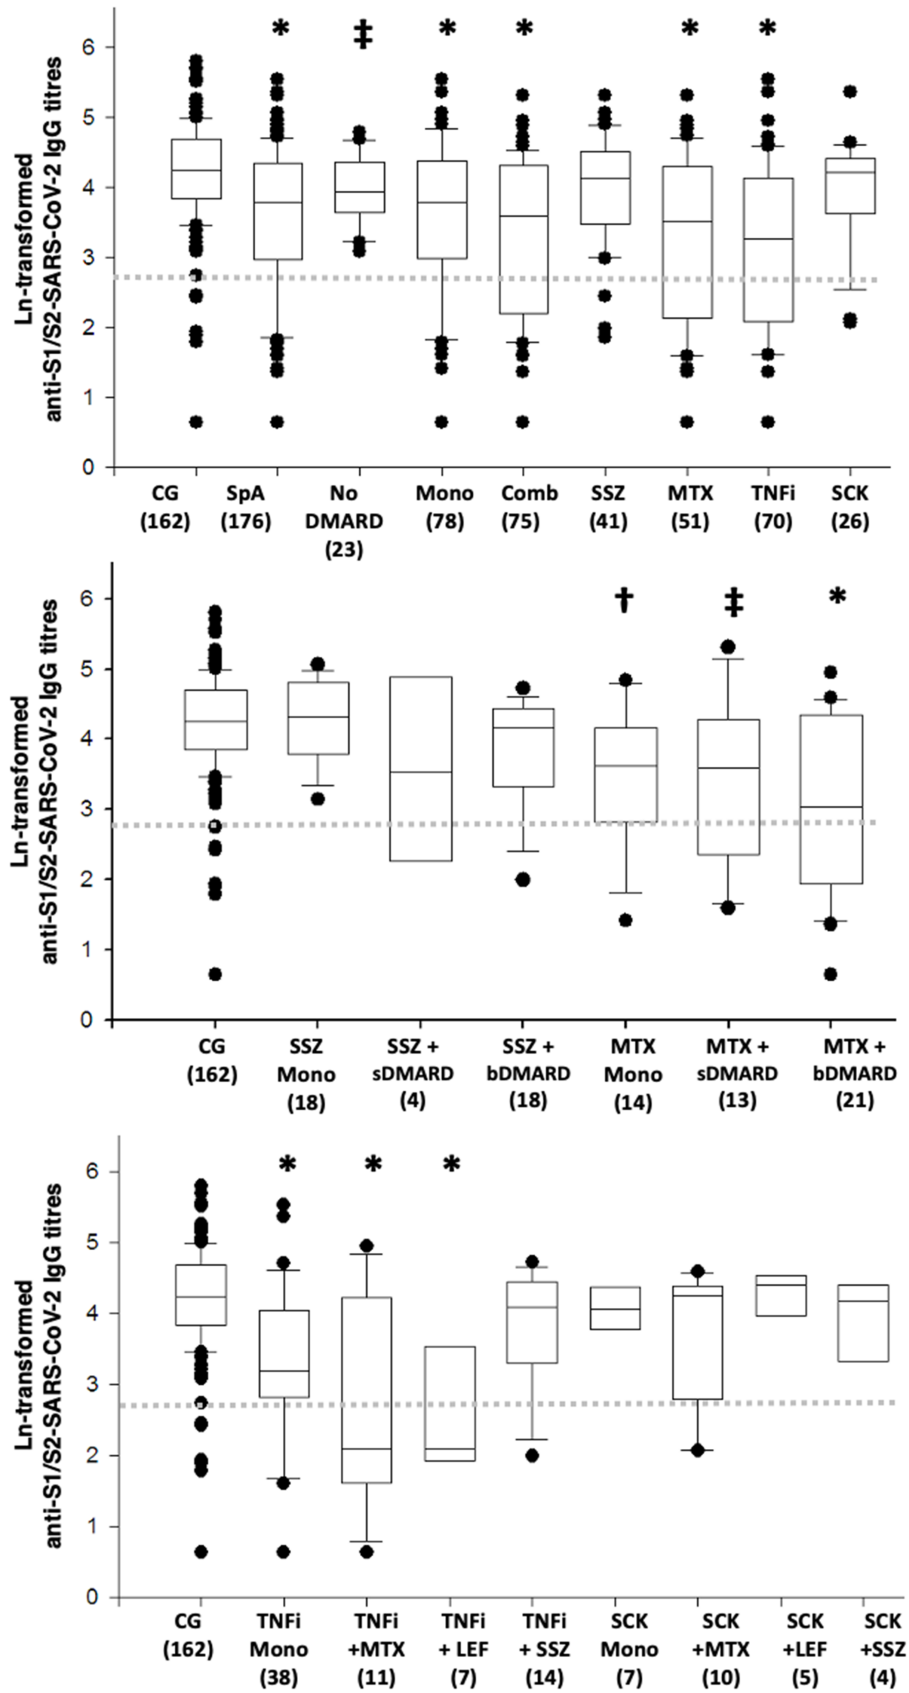

Mann–Whitney U-test was applied. Analyses were two-sided. CG - control group; SpA - spondyloarthritis; DMARD - disease modifying antirheumatic drugs; Mono - DMARD monotherapy and without corticosteroids; Comb - combination therapy of DMARD; SSZ – sulfasalazine; MTX - methotrexate; TNFi - tumor necrosis factor inhibitors; SCK – secukinumab; sDMARD – synthetic disease modifying antirheumatic drugs; bDMARD – biological disease modifying antirheumatic drugs; LEF – leflunomide; \*  $p < 0.001$  vs. CG; †  $p < 0.01$  vs. CG; ‡  $p < 0.05$  vs. CG. Dotted line denotes the cut-off level for positivity ( $\ln 15 \text{ AU/ml} = 2.71$  by Indirect ELISA, LIAISON SARS-CoV-2 S1/S2 IgG). The number of patients in groups is depicted under their designations.
